# Supplementary material
Source: ML conference proceedings conference paper supplement (https://openaccess.thecvf.com/content/CVPR2025/html/Aira_Gaussian_Splatting_for_CVPR_2025_paper.html)
Supplement: Supplementary file 1 [file Aira_Gaussian_Splatting_for_CVPR_2025_supplemental.pdf]

# Gaussian Splatting for Efficient Satellite Image Photogrammetry

## Supplementary Material

Luca Savant Aira<sup>1</sup>

Gabriele Facciolo<sup>2</sup>

Thibaud Ehret<sup>3</sup>

<https://mezzelfo.github.io/EOGS/>

<sup>1</sup> Politecnico di Torino, Corso Duca degli Abruzzi, 24, 10129 Torino TO, Italia

<sup>2</sup> Universite Paris-Saclay, CNRS, ENS Paris-Saclay, Centre Borelli, 91190, Gif-sur-Yvette, France

<sup>3</sup> AMIAD, Pôle Recherche, France

### 1. Additional visual results

We present additional visual results in Figs. 1 to 7.

### 2. Albedo and shadow visualization

We present in Figs. 8, 10 and 11 examples of albedos and shadows generated by EO-NeRF and the proposed EOGS for multiple scenes.

### 3. Details on the creation of the Sun Camera

Consider a view camera  $\mathcal{A} : \mathbb{R}^3 \rightarrow \mathbb{R}^2, \mathbf{x} \mapsto A\mathbf{x} + \mathbf{a}$ , the elevation function  $\mathcal{E} : \mathbb{R}^3 \rightarrow \mathbb{R}, \mathbf{x} \mapsto \mathbf{e}^T \mathbf{x} + \Delta e$ , and the sunlight direction  $\mathbf{d} \in \mathbb{R}^3$  (available as elevation and azimuth from the dataset). Then the sun camera is  $\mathcal{S} : \mathbb{R}^3 \rightarrow \mathbb{R}^2, \mathbf{x} \mapsto A(\mathbb{I}_3 - \frac{\mathbf{d}\mathbf{d}^T}{\mathbf{e}^T \mathbf{d}})\mathbf{x} + \mathbf{a}$ .

### 4. Runtime details

The first line of Tab. 1 shows the number of views per scene, which is the same for all methods and ablations, hence it cannot be the source of EOGS speed.

The second line of Tab. 1 shows the number  $K_0$  of Gaussians instanced at initialization. Note that the number of gaussians primitive  $K$  is non-increasing during the optimization, hence  $K_0$  is also the peak number of Gaussians (and the peak memory usage  $\approx 10\text{GB}$ ). As the scene volumes differ, we advocate to set  $K_0 = 0.13V$ , where  $V$  is the volume of the scene, such that a bigger scene, having more objects, has more Gaussians to represents them. The value of 0.13 was found experimentally, as a good trade-off between speed and reconstruction quality.

| Scene (JAX/IARPA) | 004  | 068  | 214  | 260  | 001  | 002  | 003  |
|-------------------|------|------|------|------|------|------|------|
| #views            | 8    | 16   | 20   | 14   | 24   | 20   | 21   |
| $K_0 [10^6]$      | 0.40 | 1.00 | 2.27 | 0.67 | 0.93 | 1.47 | 1.47 |

Table 1

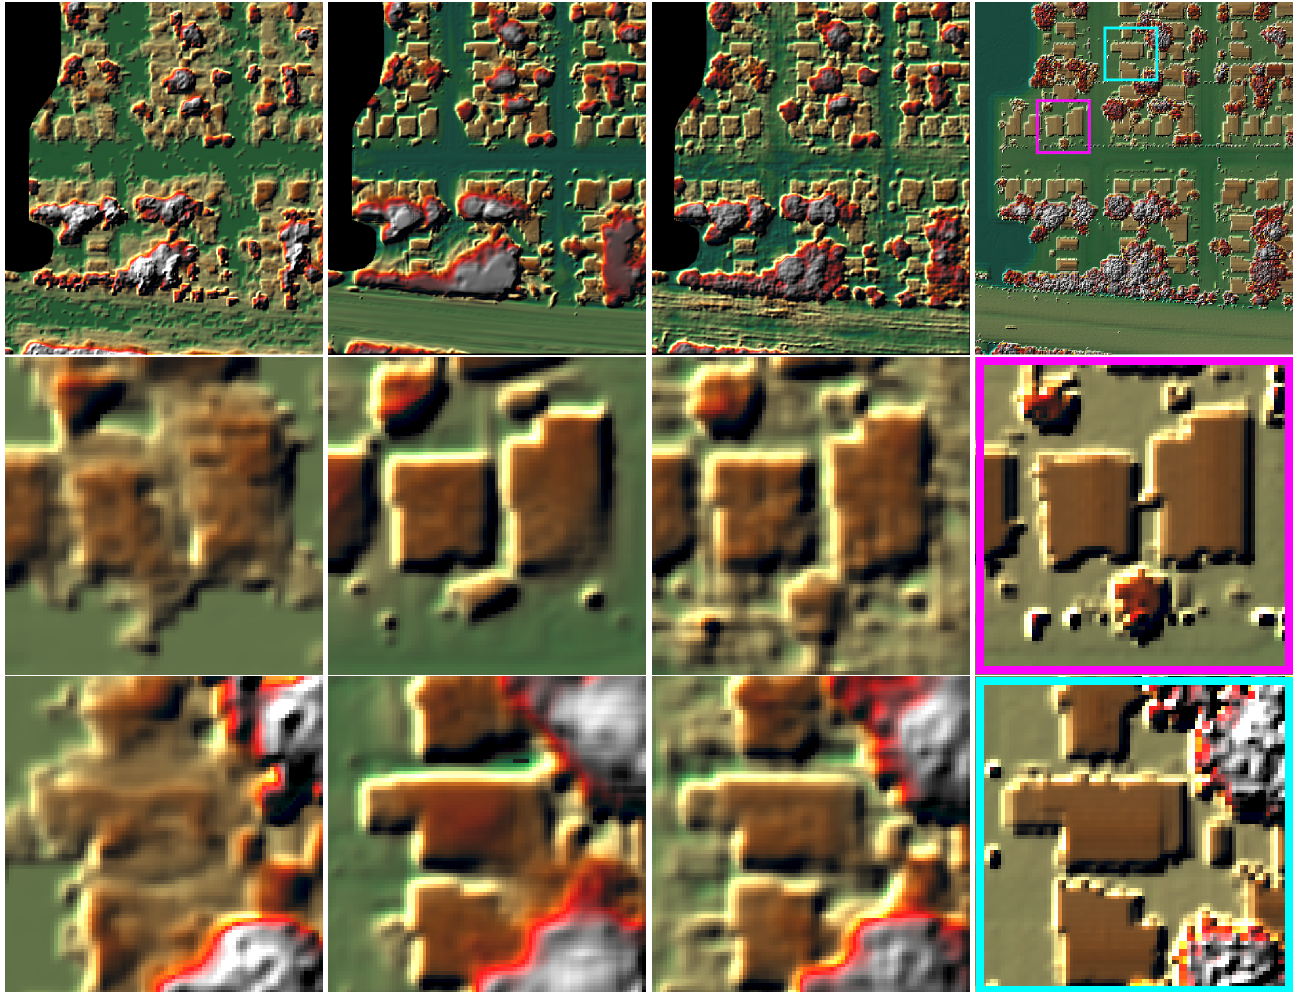

Figure 1. From left to right: visual results on JAX.004 comparing SAT-NGP [1], EOGS, EO-NeRF [2] and the ground truth.

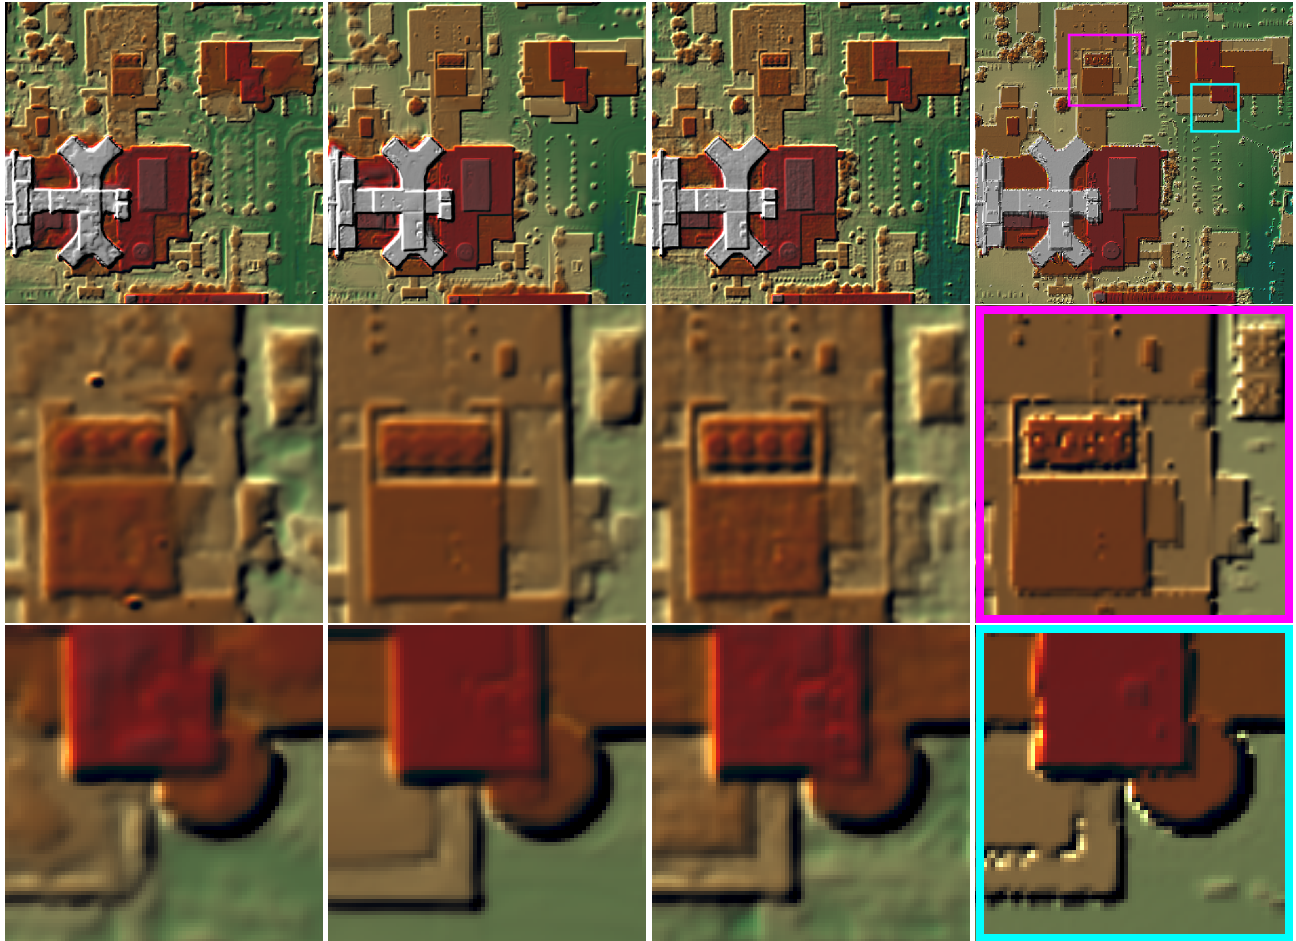

Figure 2. From left to right: visual results on JAX\_068 comparing SAT-NGP [1], EOGS, EO-NeRF [2] and the ground truth.

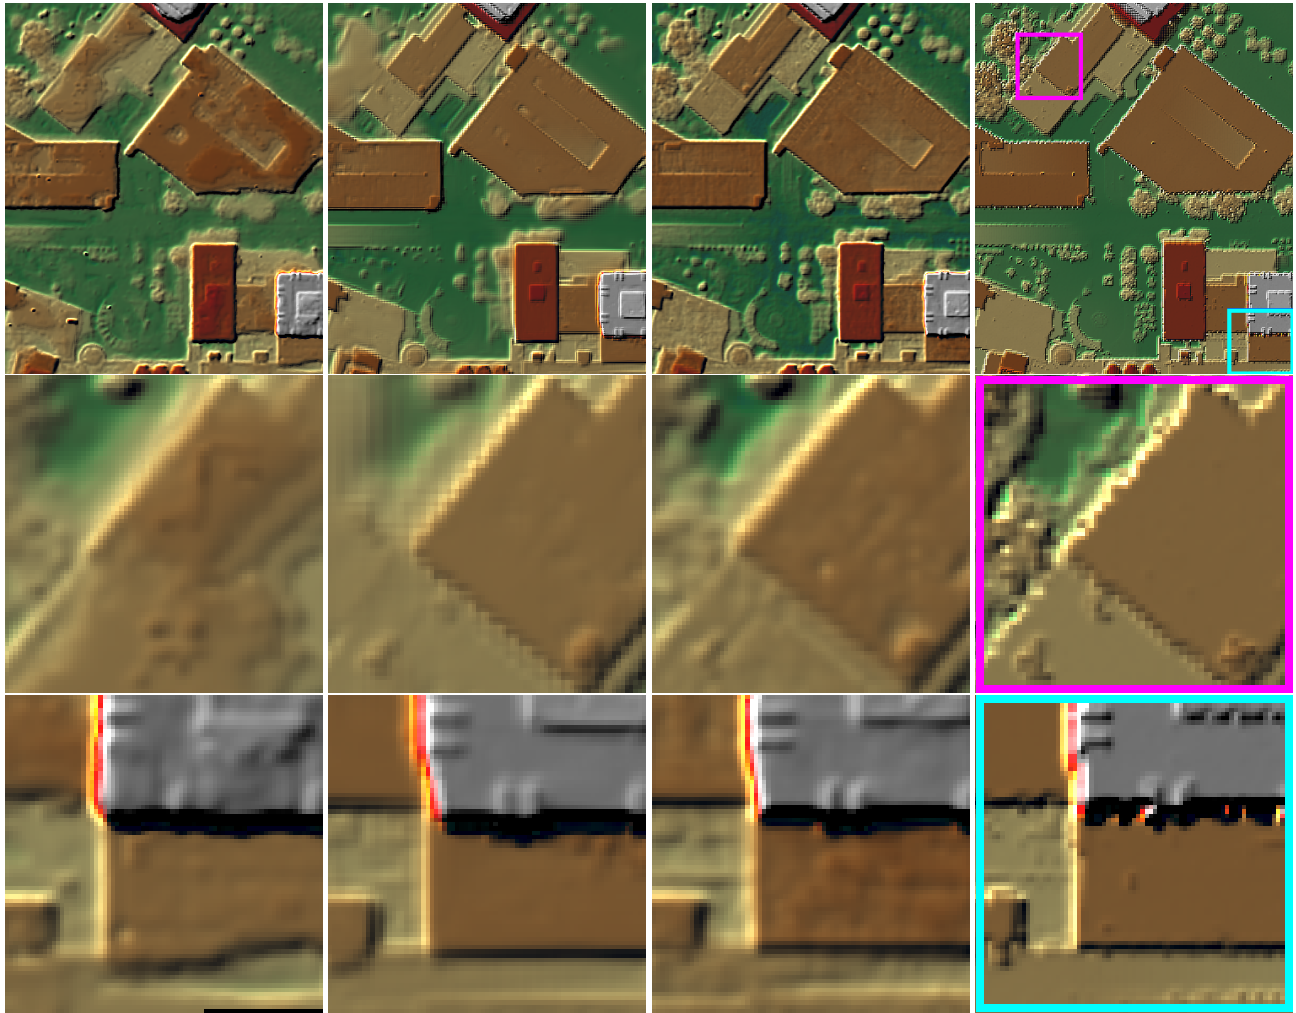

Figure 3. From left to right: visual results on JAX\_214 comparing SAT-NGP [1], EOGS, EO-NeRF [2] and the ground truth.



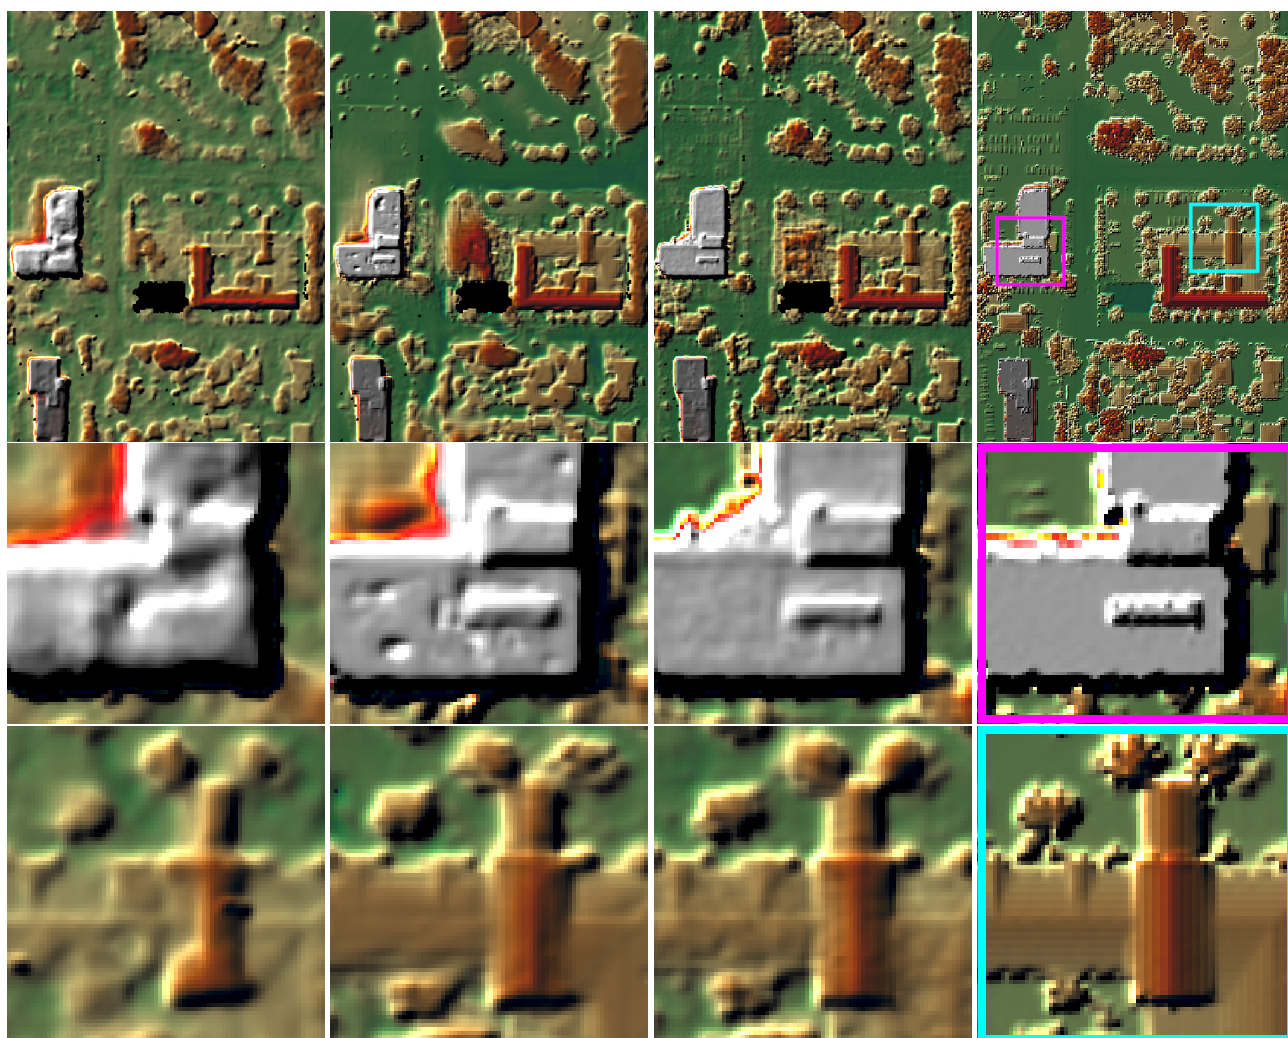

Figure 4. From left to right: visual results on JAX\_260 comparing SAT-NGP [1], EOGS, EO-NeRF [2] and the ground truth.

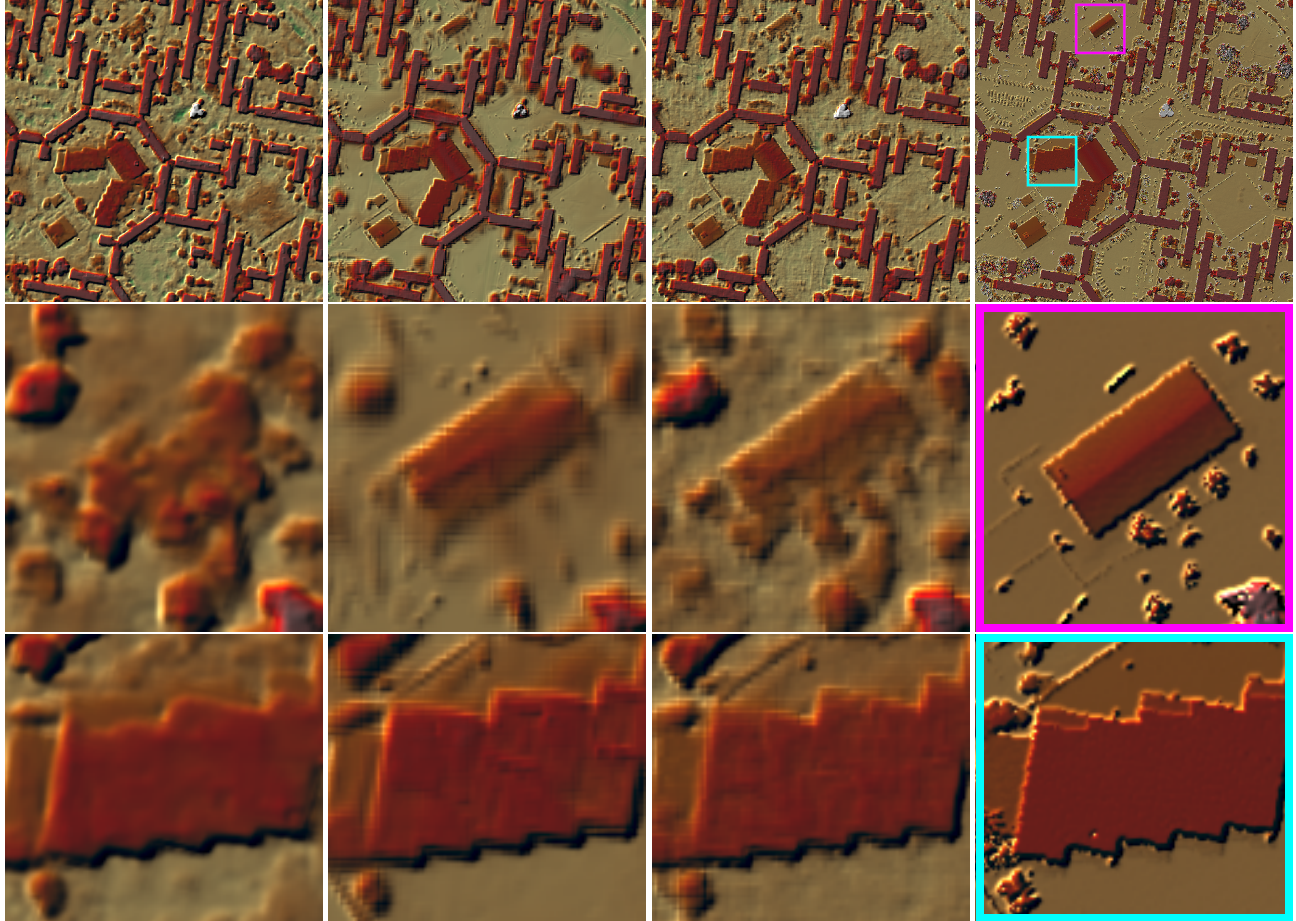

Figure 5. From left to right: visual results on IARPA\_001 comparing SAT-NGP [1], EOGS, EO-NeRF [2] and the ground truth.

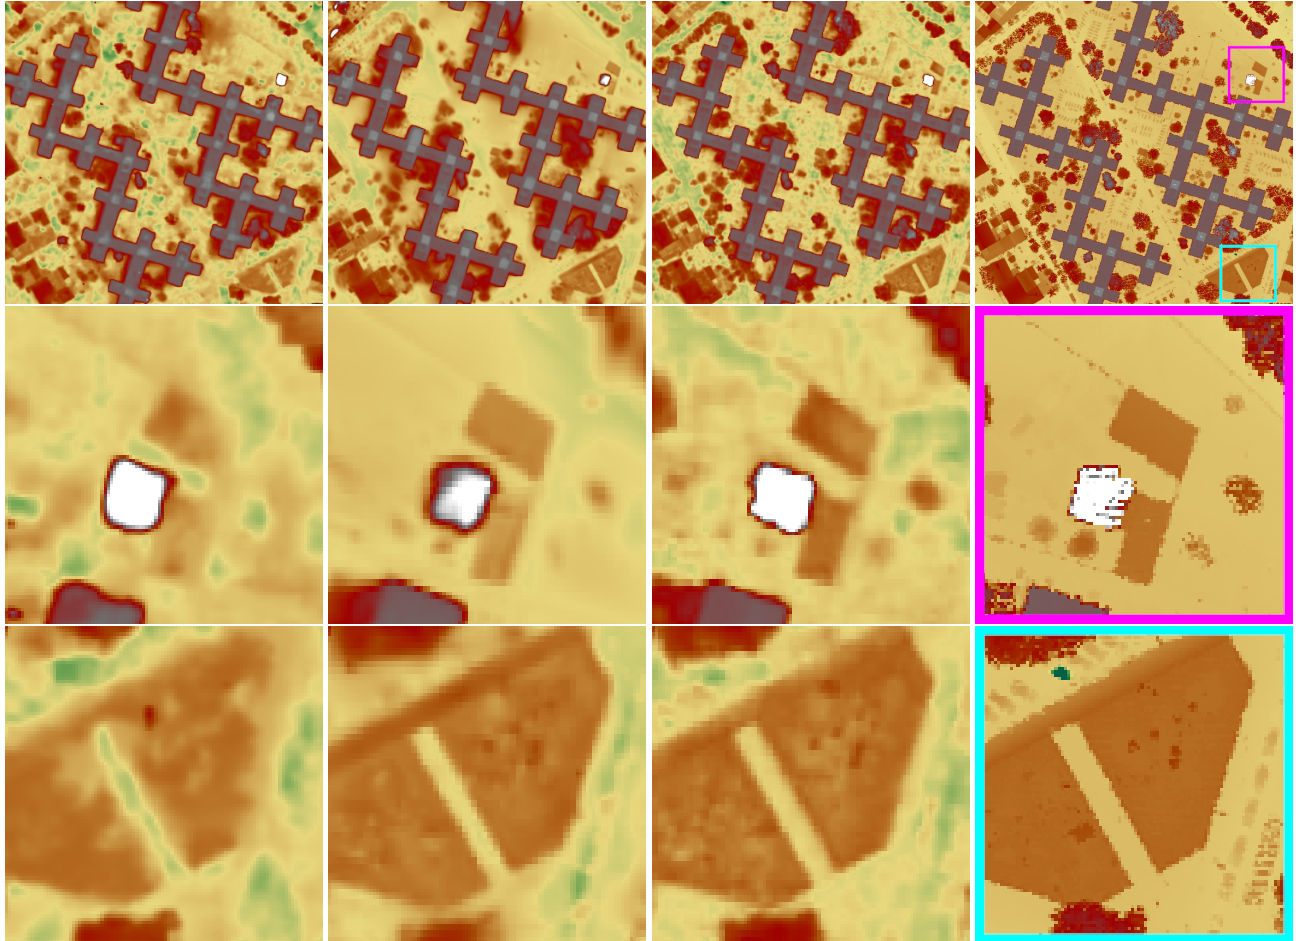

Figure 6. From left to right: visual results on IARPA\_002 comparing SAT-NGP [1], EOGS, EO-NeRF [2] and the ground truth.

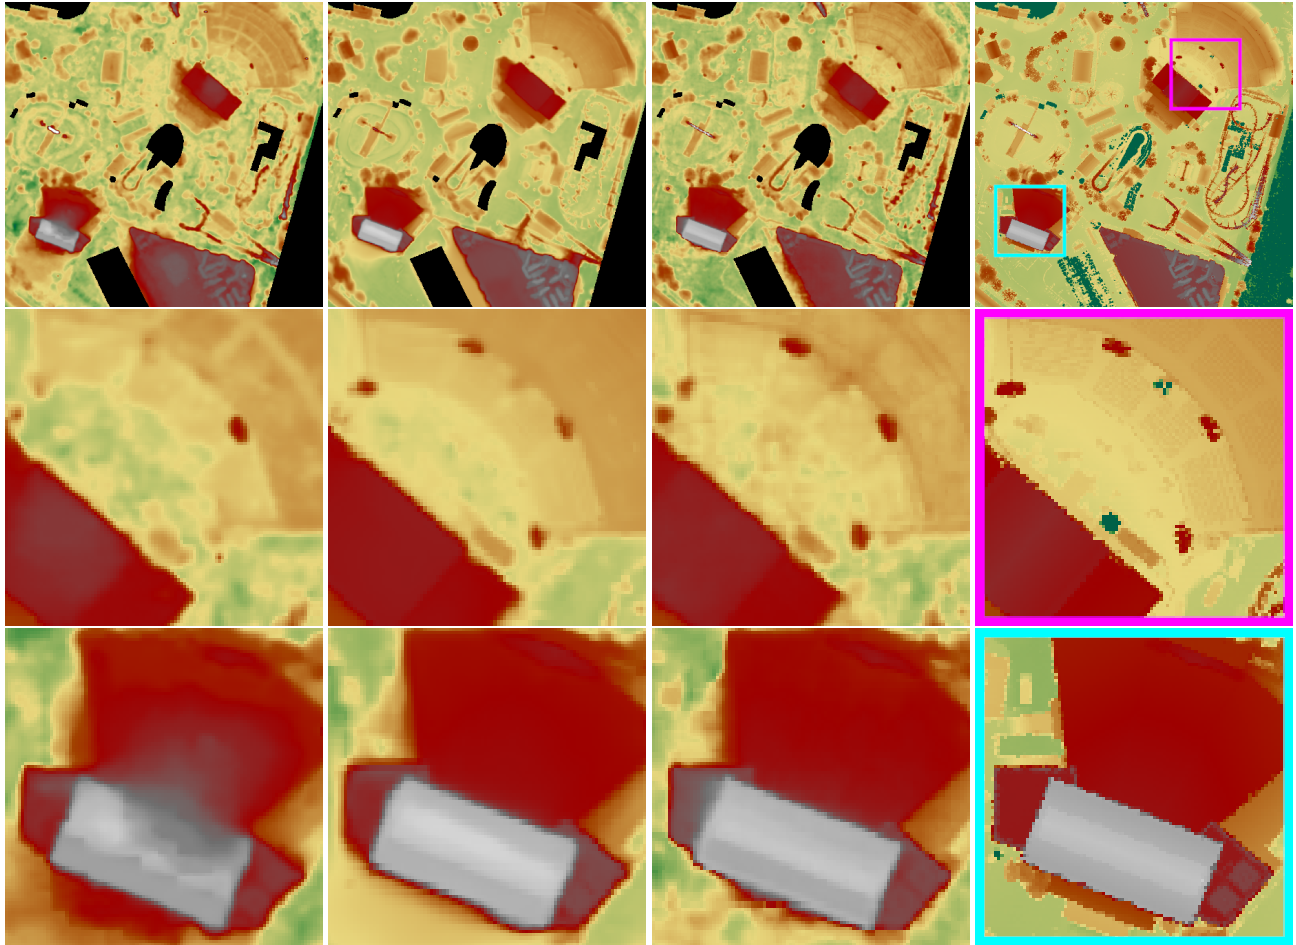

Figure 7. From left to right: visual results on IARPA\_003 comparing SAT-NGP [1], EOGS, EO-NeRF [2] and the ground truth.



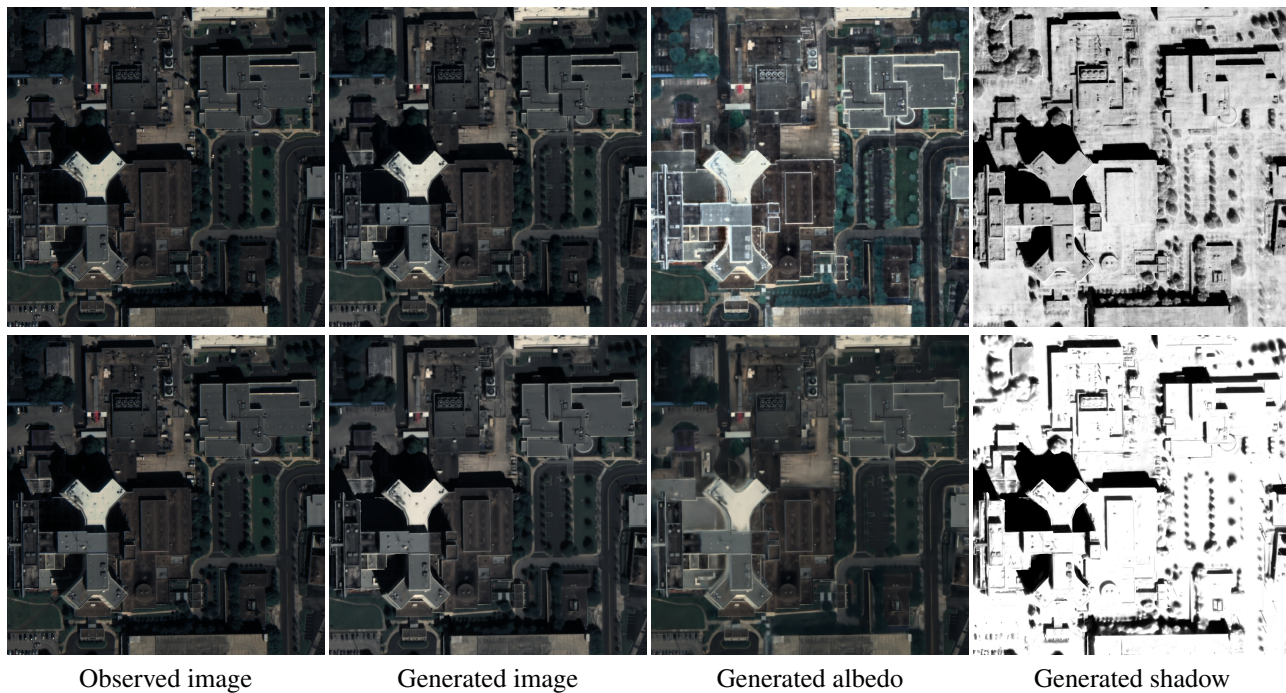

Figure 8. Visual comparison of the scene albedo and shadows generated by EO-NeRF (top) and EOGS (bottom) for JAX\_068. Note that the scaling for all images is the same except for the albedo that is rescaled independently to show the entire dynamic.

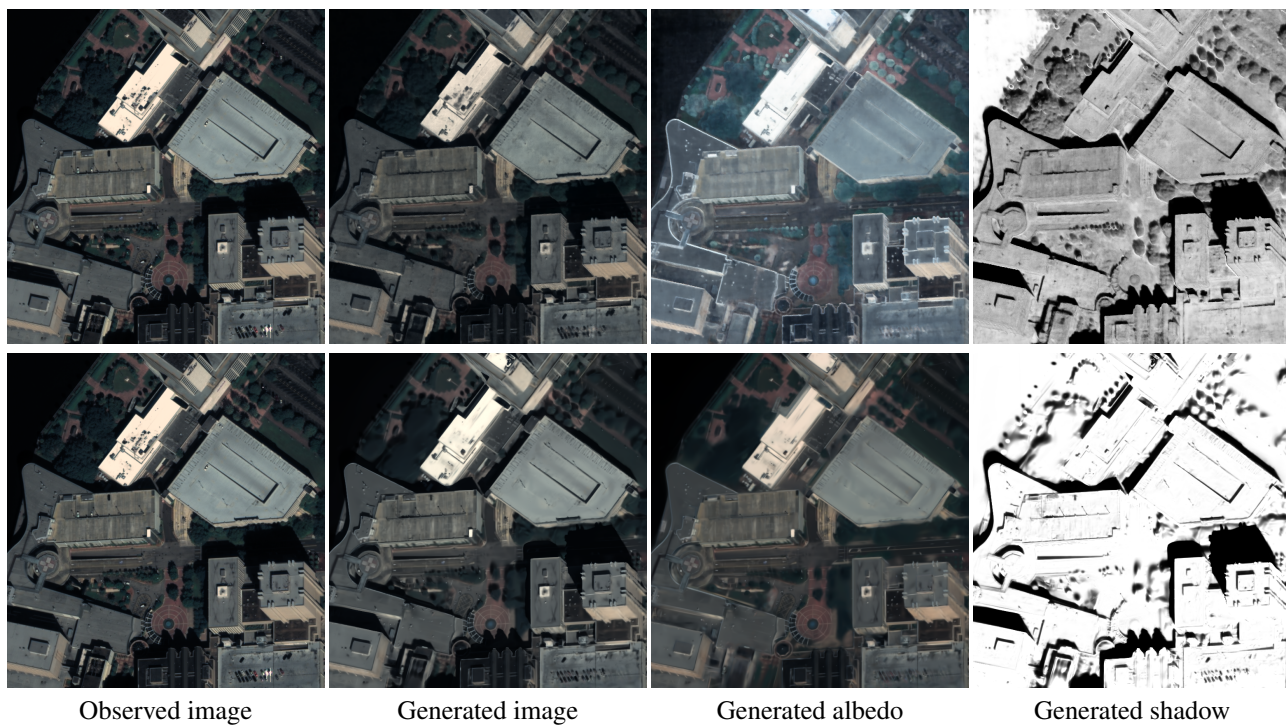

Figure 9. Visual comparison of the scene albedo and shadows generated by EO-NeRF (top) and EOGS (bottom) for JAX\_214. Note that the scaling for all images is the same except for the albedo that is rescaled independently to show the entire dynamic.



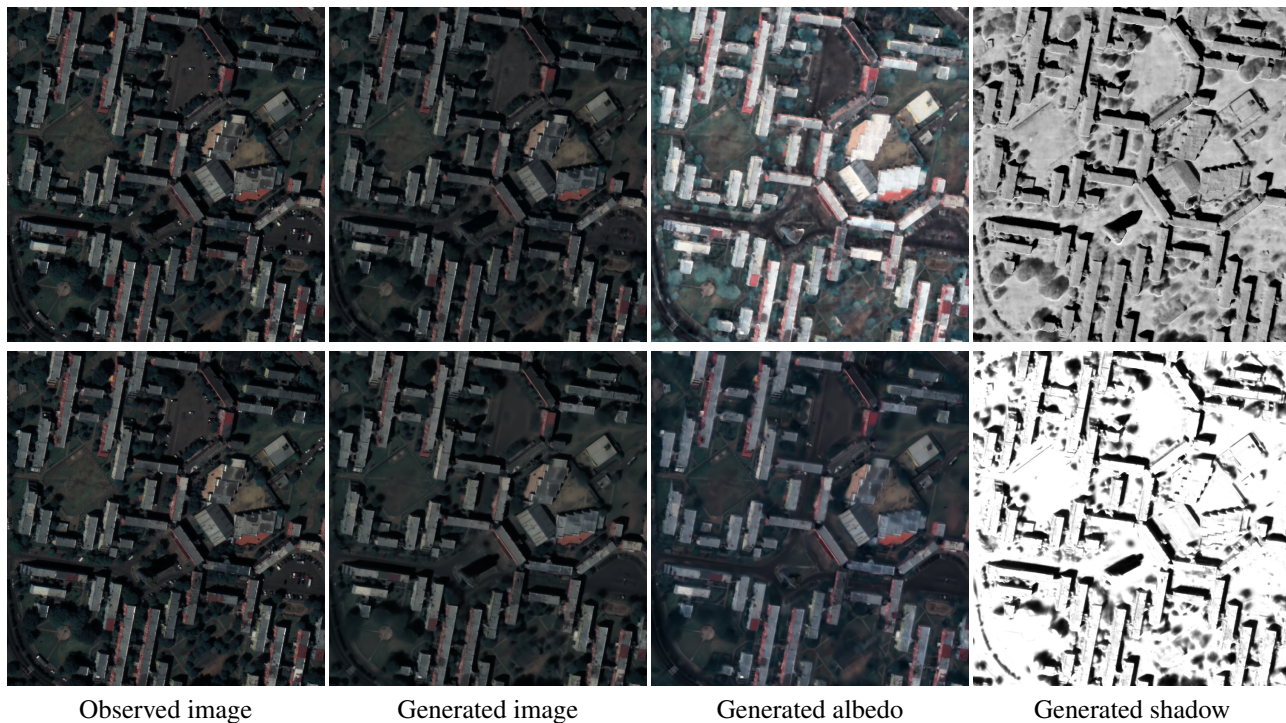

Figure 10. Visual comparison of the scene albedo and shadows generated by EO-NeRF (top) and EOGS (bottom) for IARPA\_001. Note that the scaling for all images is the same except for the albedo that is rescaled independently to show the entire dynamic.

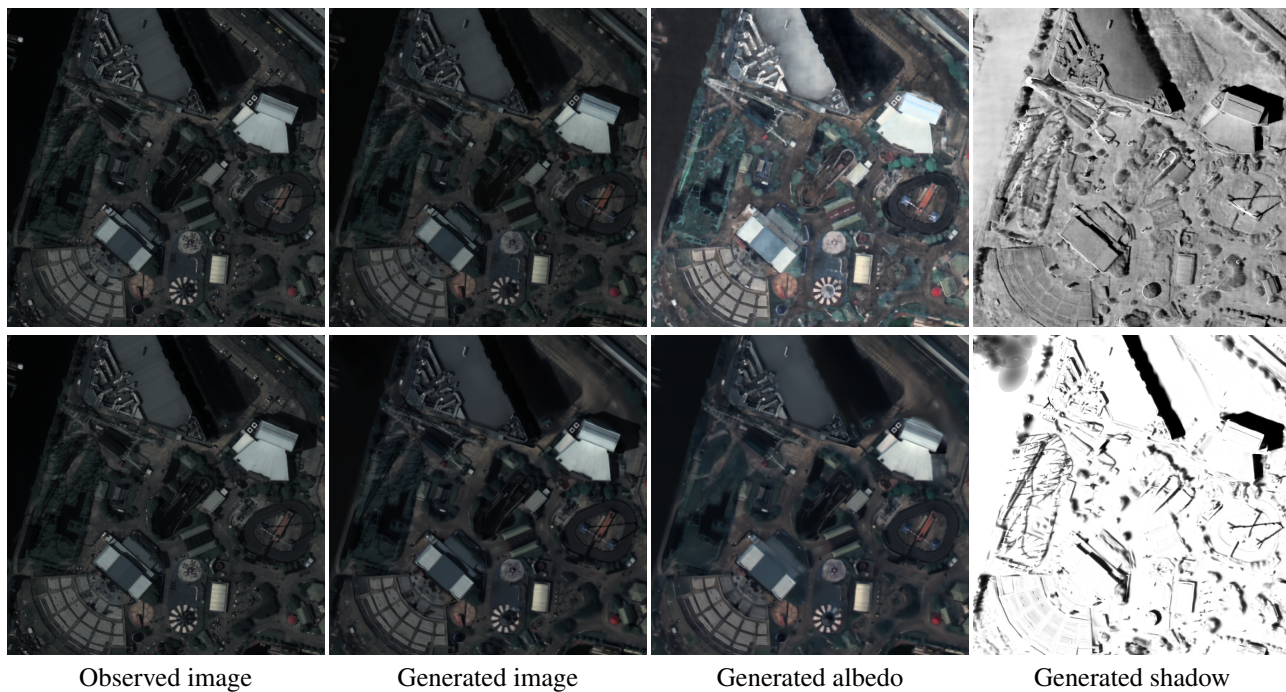

Figure 11. Visual comparison of the scene albedo and shadows generated by EO-NeRF (top) and EOGS (bottom) for IARPA\_003. Note that the scaling for all images is the same except for the albedo that is rescaled independently to show the entire dynamic.

## References

- [1] Camille Billouard, Dawa Derksen, Emmanuelle Sarrazin, and Bruno Vallet. Sat-ngp : Unleashing neural graphics primitives for fast relightable transient-free 3d reconstruction from satellite imagery. In *IGARSS 2024 - 2024 IEEE International Geoscience and Remote Sensing Symposium*, pages 8749–8753, 2024. [2](#), [3](#), [4](#), [5](#), [6](#), [7](#), [8](#)
- [2] Roger Marí, Gabriele Facciolo, and Thibaud Ehret. Multi-date earth observation nerf: The detail is in the shadows. In *Proceedings of the IEEE/CVF Conference on Computer Vision and Pattern Recognition*, pages 2035–2045, 2023. [2](#), [3](#), [4](#), [5](#), [6](#), [7](#), [8](#)
